# Supplementary material for: Functional characterization of six SLCO1B1 (OATP1B1) variants observed in Finnish individuals with a psychotic disorder
Source: bioRxiv or medRxiv preprint supplement (doi:10.1101/2022.08.10.22278615), 2022-08-10

**Supplementary Table I** Mutagenesis primers used in creating SNVs in the SLCO1B1 gene. Small case letter denotes the nucleotide substitution.

| SNV       | Amino acid change | Forward                      | Reverse                |
|-----------|-------------------|------------------------------|------------------------|
| c.317T>C  | Ile106Thr         | ATTATGGGAAcTGGAGGTGTT        | GAAACAACCGATTCCAATTAAC |
| c.629G>T  | Gly210Val         | ATTTAGGTATgTTGAATGCAATAG     | ACAAAGAAGAATGTCCTTC    |
| c.633A>G  | Ile211Met         | TTGTATTTAGtTATATTGAATGCAATAG | AGAAGAATGTCCTTCTTTAG   |
| c.639T>A  | Asn213Lys         | GTATATTGAAaGCAATAGCAATGATTG  | CTAAATACAAAGAAGAATGTCC |
| c.820A>G  | Ile274Val         | TATTTCTTCCgTACCATTCTTTTTC    | ATGGAGAATAGTCCAGAC     |
| c.2005A>C | Asn669His         | GGATGAAGCAcACTTAGAATCC       | ATGACACTTCCATTTTCTG    |

**Supplementary Table II** Absolute amount of OATP1B1 in proteomics samples.

Na<sup>+</sup>/K<sup>+</sup>/ATPase unique peptide: AAVPDAVGK, OATP1B1 unique peptide: LNTVGIK

| Variant   | Average OATP1B1 abundance fmol/μg protein | Standard error of the mean | Average Na <sup>+</sup> /K <sup>+</sup> /ATPase abundance fmol/μg protein | Standard error of the mean |
|-----------|-------------------------------------------|----------------------------|---------------------------------------------------------------------------|----------------------------|
| Reference | 1.09                                      | 0.52                       | 2.45                                                                      | 0.59                       |
| I106T     | 1.09                                      | 0.49                       | 2.61                                                                      | 0.58                       |
| G210V     | 0.21                                      | 0.059                      | 1.81                                                                      | 0.27                       |
| I211M     | 0.95                                      | 0.27                       | 2.49                                                                      | 0.51                       |
| N213K     | 0.63                                      | 0.29                       | 1.84                                                                      | 0.23                       |
| I274V     | 0.73                                      | 0.29                       | 1.92                                                                      | 0.14                       |
| N669H     | 0.62                                      | 0.23                       | 1.92                                                                      | 0.36                       |

**Supplementary Figure 1** Absolute amount of OATP1B1 and Na<sup>+</sup>/K<sup>+</sup>/ATPase in proteomics samples: individual samples coupling the abundance of two unique peptides AAVPDAVGK for Na<sup>+</sup>/K<sup>+</sup>/ATPase and LNTVGIK for OATP1B1.

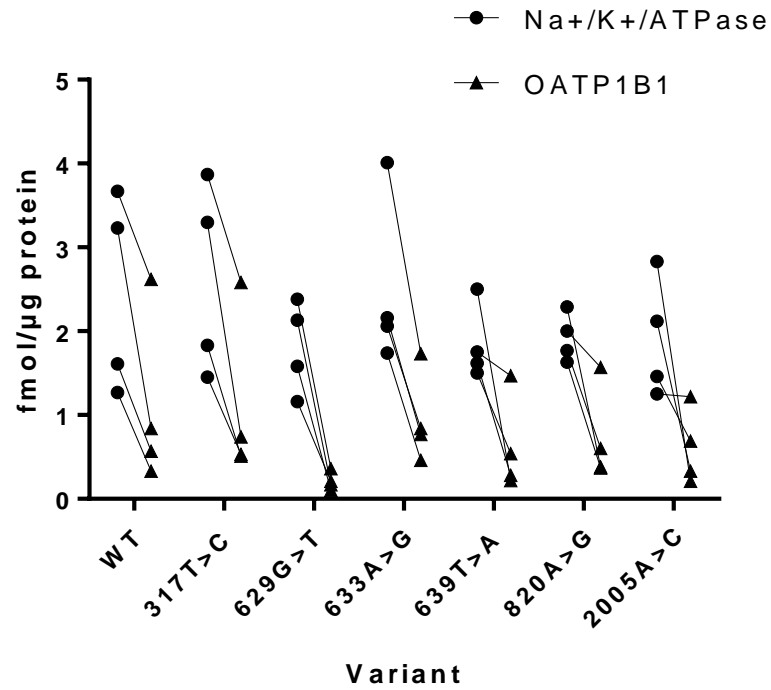

Supplement: Supplementary file [file media-1.pdf]
